# Supplementary material
Source: Springer Nature journal article supplement (https://www.springermedizin.de/resource/supplementary/40478_2013_12_MOESM2_ESM.pdf/25658114)

**A**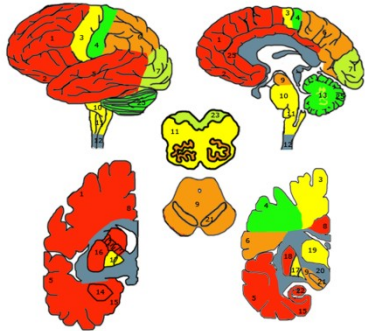

aFTLD (F1)

**B**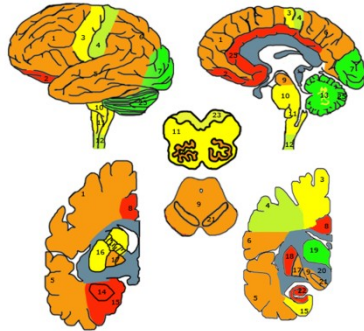

aFTLD (F2)

**C**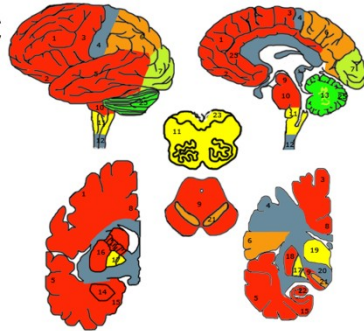

aFTLD (F3)

**D**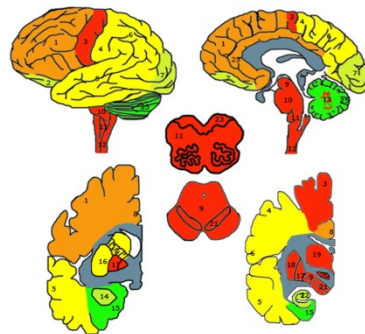

BIBD (B1)

**E**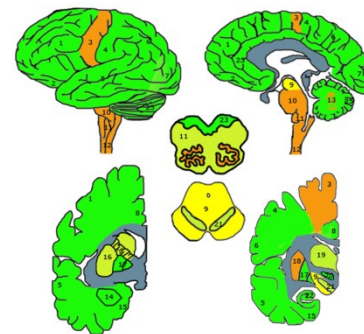

BIBD (B2)

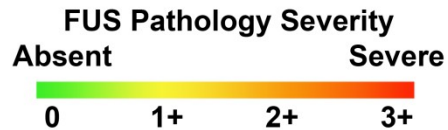

Supplement: MOESM2 [file 25658114]
